# Supplementary material for: The actin-binding protein Lasp promotes Oskar accumulation at the posterior pole of theDrosophilaembryo
Source: Oxford University Press journal article supplement (doi:10.1242/dev.027698), 2008-11-27
Supplement: dev027698-sup-027698-tables1.pdf [file dev027698-sup-027698-tables1.pdf]

**Table S1. Oskar two-hybrid screen hits**

| Number of clones | ID/comments          | <i>lacZ</i> | -Leu growth | Potential function                              |
|------------------|----------------------|-------------|-------------|-------------------------------------------------|
| 119              | Vas (CG3506)         | 3           | 3           | Known Oskar interactor                          |
| 18               | Lasp (CG3849)        | 3           | 2           | Actin binding protein                           |
| 11               | RPL31                | 2           | 2           | Ribosomal protein                               |
| 5                | Mtrm (CG18543)       | 1           | 1           | Unknown, cell cycle arrest                      |
| 5                | CG3731 (rat MPPB)    | 3           | 2           | Peptidase                                       |
| 3                | Homo, fragile X like | 1           | 1           | Unknown                                         |
| 2                | CG13083              | 2           | 2           | Chorion                                         |
| 2                | CG2774               | 2           | 2           | Phosphoinositide binding?                       |
| 2                | CG31223              | 3           | 2           | Human: snRNA activating 190 kDa protein complex |
| 1                | Nocturnin (CG31299)  | 2           | 3           | Unknown                                         |
| 1                | 16S rRNA gene        | 3           | 2           | Ribosomal RNA gene                              |
| 1                | CG30497              | 2           | 1           | Unknown                                         |
| 1                | Cactus (CG5848)      | 2           | 0           | Dorsal repressor                                |
| 1                | CG11063              | 2           | 3           | Nuclear receptor, Lim domain Zn finger          |
| 1                | CG5746               | 3           | 3           | Unknown                                         |
| 1                | Smox (CG31223)       | 3           | 1           | Smad                                            |

Clone IDs and number of times found among the initial 480 clones analyzed. *lacZ* and -Leu growth numbers represent arbitrary numbers reflecting signal strength (*lacZ*) or growth rate (-Leu) on a scale from 1 (weak) to 3 (strong). Clones that were not studied further were either non-specific, showed very low *lacZ* expression or did not interact reproducibly.
